# Supplementary material for: A highly bioactive bone extracellular matrix-biomimetic nanofibrous system with rapid angiogenesis promotes diabetic wound healing
Source: Royal Society of Chemistry journal article supplement (doi:10.1039/c7tb01484h), 2017-01-01
Supplement: c7tb01484h1.pdf [file c7tb01484h1.pdf]

**A Highly Bioactive Bone Extracellular Matrix-biomimetic Nanofibrous System with  
Rapid Angiogenesis Promotes Diabetic Wound Healing**

**Wendong Gao<sup>1, 2#</sup>, Wanwan Jin<sup>1#</sup>, Yannan Li<sup>3</sup>, Li Wan<sup>4</sup>, Chenggui Wang<sup>1</sup>, Cai Lin<sup>2,4</sup>, Xiaofeng Chen<sup>2\*</sup>, Bo Lei<sup>3\*</sup>, Cong Mao<sup>1,2\*</sup>**

<sup>1</sup> *Key Laboratory of Orthopedics of Zhejiang Province, the Second Affiliated Hospital and Yuying Children's Hospital of Wenzhou Medical University, Wenzhou 325027, China*

<sup>2</sup> *National Engineering Research Center for Tissues Restoration and Reconstruction, South China University of Technology, Guangzhou 510640, China*

<sup>3</sup> *Frontier Institute of Science and Technology, State Key Laboratory for Mechanical Behavior of Materials, Xi'an Jiaotong University, Xi'an 710000, China*

<sup>4</sup> *Department of Burn, the First Affiliated Hospital of Wenzhou Medical University, Wenzhou 325000, China*

*\*Corresponding authors:*

*Prof. Bo Lei, Email: rayboo@xjtu.edu.cn;*

*Prof. Xiaofeng Chen, Email: chenxf@scut.edu.cn;*

*Dr. Cong Mao, Email: maocong@wmu.edu.cn.*

*# The first two authors contributed equally to this work.*

**Table S1. Primers used for real-time PCR analysis**

| Genes          | Forward primers      | Reverse primers       | Size (bp) |
|----------------|----------------------|-----------------------|-----------|
| Hif-1 $\alpha$ | TTCATTTAGAGGCCTGGCT  | ATGCATTGGTCAAATGCTGG  | 153       |
|                |                      | G                     |           |
| Col I          | AAGGTTTCACCCGCAACTCA | CGTAGCCGTTTCATGCTTGTG | 144       |
| $\alpha$ -SMA  | GTCAACTGTGGAGCAACACG | TTCCGTCTCCTTGGTTCAGC  | 108       |
| VEGF           | CTCATCAGCCAGGGAGTCTG | AGGAGCAACCTCTCCAAACC  | 158       |
| $\beta$ -actin | ACTCTGTGTGGATTGGTGGC | AGAAAGGGTGTAACGCAGC   | 155       |
